# Supplementary material for: Diacetylene-Based Colorimetric Radiation Sensors for the Detection and Measurement of γ Radiation during Blood Irradiation
Source: PubMed Central journal article supplement — ACS Omega. 2021 Mar 29;6(14):9482–91. doi: 10.1021/acsomega.0c06184 (PMC8047693; doi:10.1021/acsomega.0c06184), 2021-03-29
Supplement: ao0c06184_si_001.pdf [file ao0c06184_si_001.pdf]

## SUPPORTING INFORMATION

### Diacetylene Based Colorimetric Radiation Sensors for the Detection and Measurement of Gamma Radiation during Blood Irradiation

Apoorva Mittal,<sup>1</sup> Shalini Verma,<sup>3#</sup> N. Gopishankar,<sup>2#</sup> Pratik Kumar<sup>1\*</sup> and Akhilesh K. Verma<sup>3\*</sup>

<sup>1</sup> Department of Medical Physics, Dr. B. R. A. Institute Rotary Cancer Hospital, All India Institute of Medical Sciences, New Delhi 110029, India

<sup>2</sup> Department of Radiotherapy, Dr. B. R. A. Institute Rotary Cancer Hospital, All India Institute of Medical Sciences, New Delhi 110029, India

<sup>3</sup> Department of Chemistry, University of Delhi, Delhi 110007, India

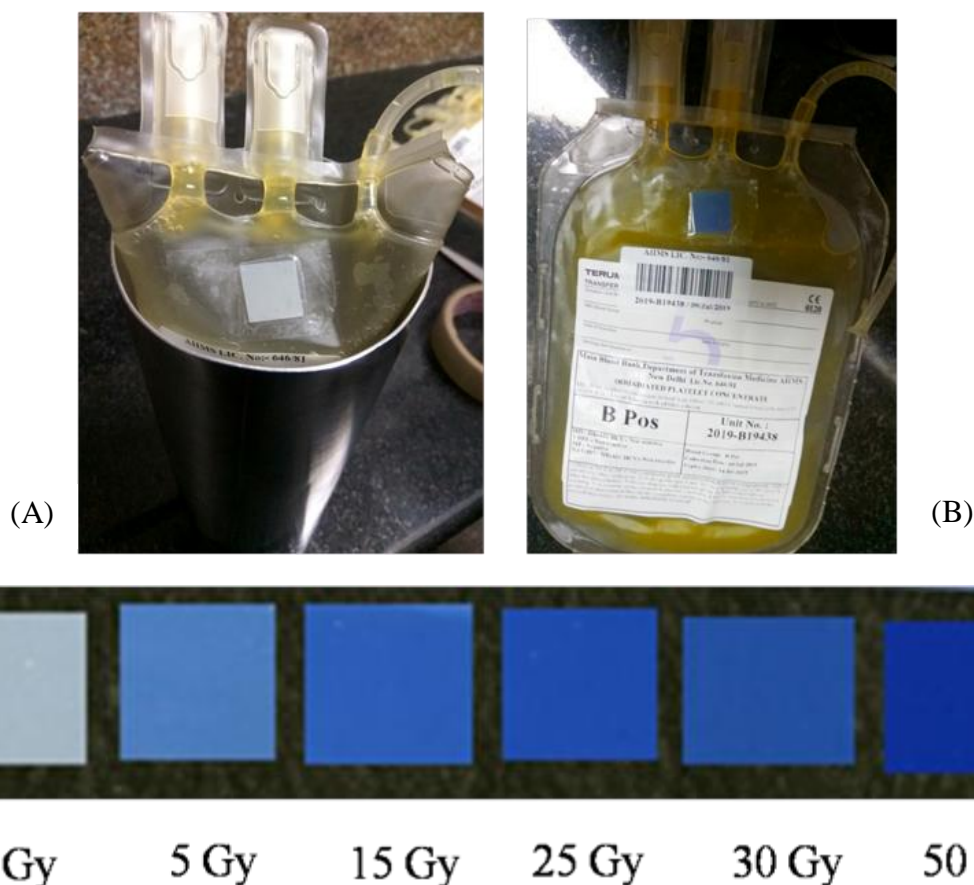

Figure S1: Photographs of the developed film dosimeter pasted on platelet bag which is placed in a cylindrical canister positioned on a turntable of the blood irradiator a) before irradiation b) after irradiation. The distinct color transition from white to blue pre irradiation (A) and post irradiation (B) can be distinctly seen by naked eyes. (C) The color gradient with increasing gamma radiation doses from 0 to 50 Gy.

# Copies of $^1\text{H}$ , $^{13}\text{C}$ NMR and HRMS

PCDA- AN 1

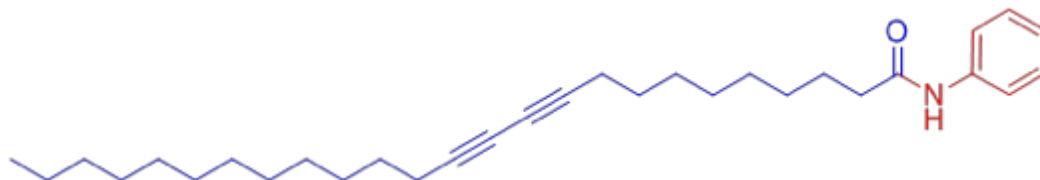

*N*-phenylpentacos-10,12-diyamide

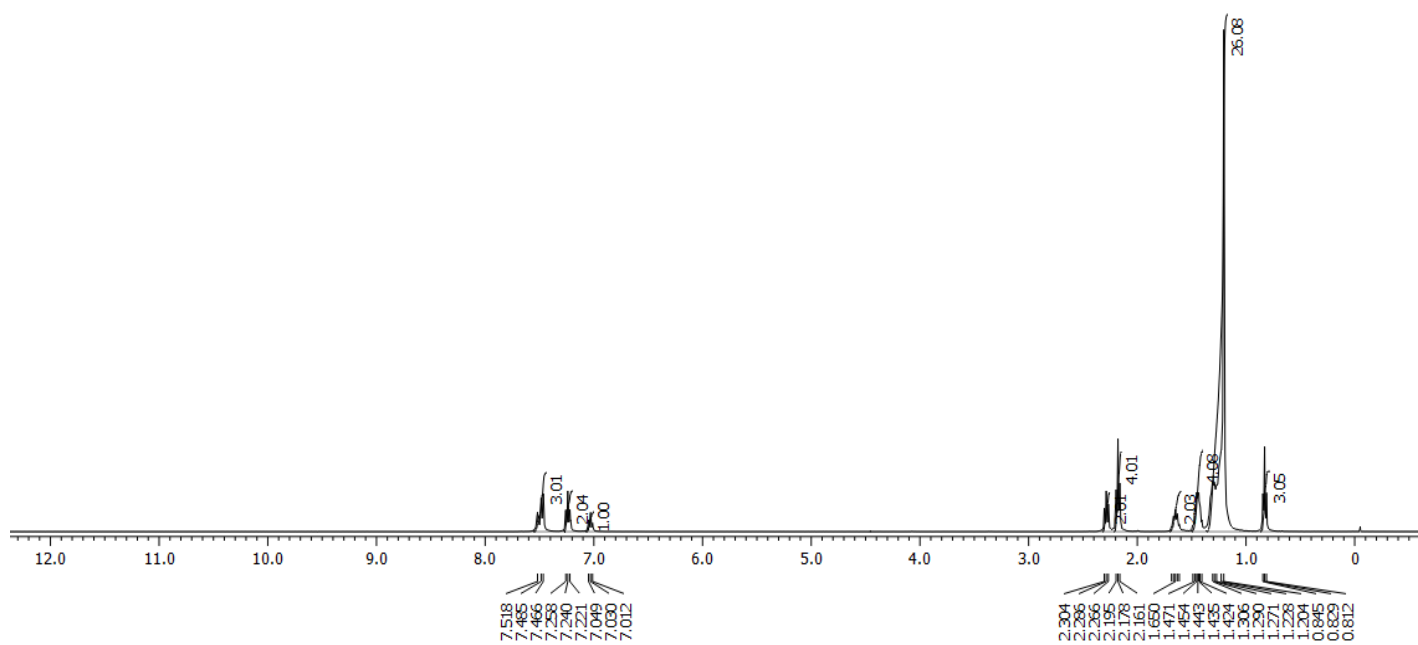

Figure S2.i:  $^1\text{H}$  NMR spectra of *N*-phenylpentacos-10,12-diyamide

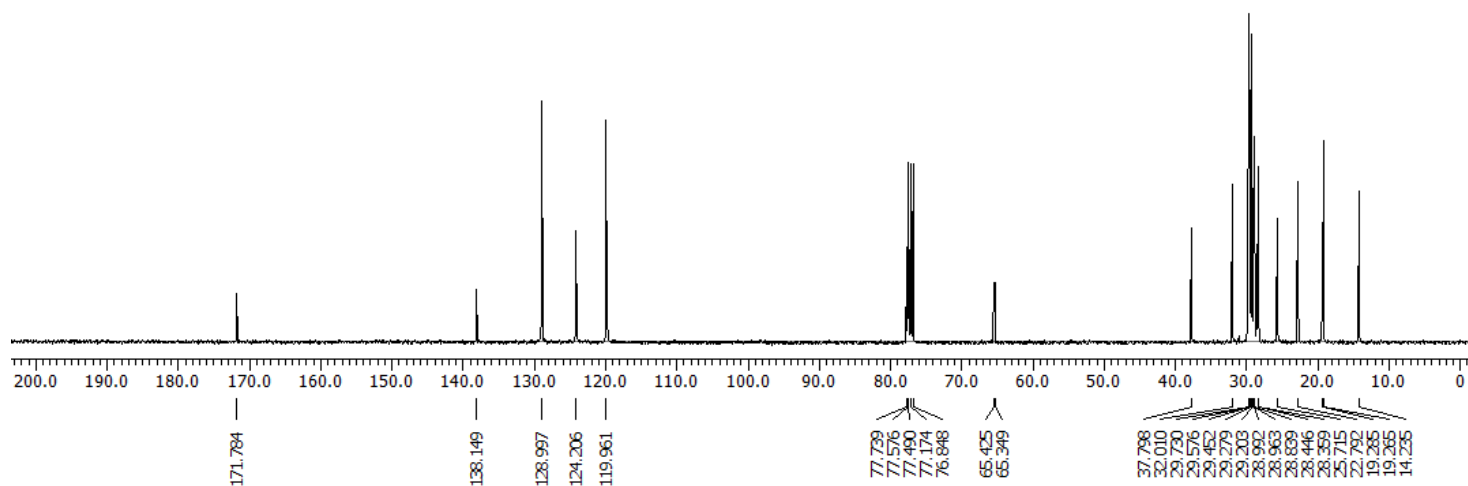

Figure S2.ii:  $^{13}\text{C}$  NMR spectra of *N*-phenylpentacos-10,12-dynamide

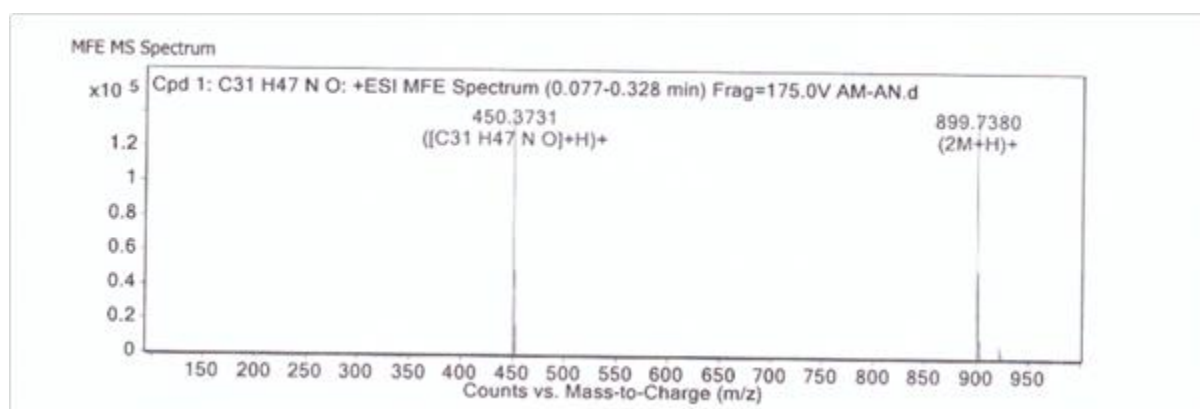

Figure S2.iii: HRMS spectra of *N*-phenylpentacos-10,12-dynamide

# PCDA- TNAP 2

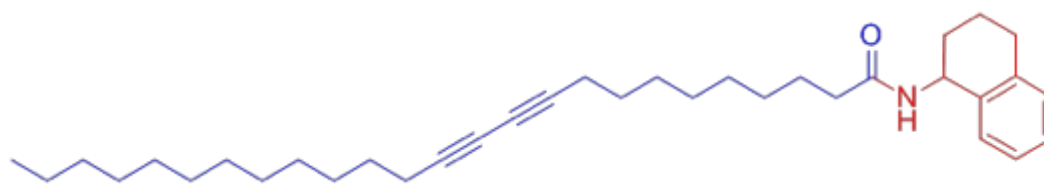

***N*-(1,2,3,4-tetrahydronaphthalen-1-yl)pentacos-10,12-diyne**

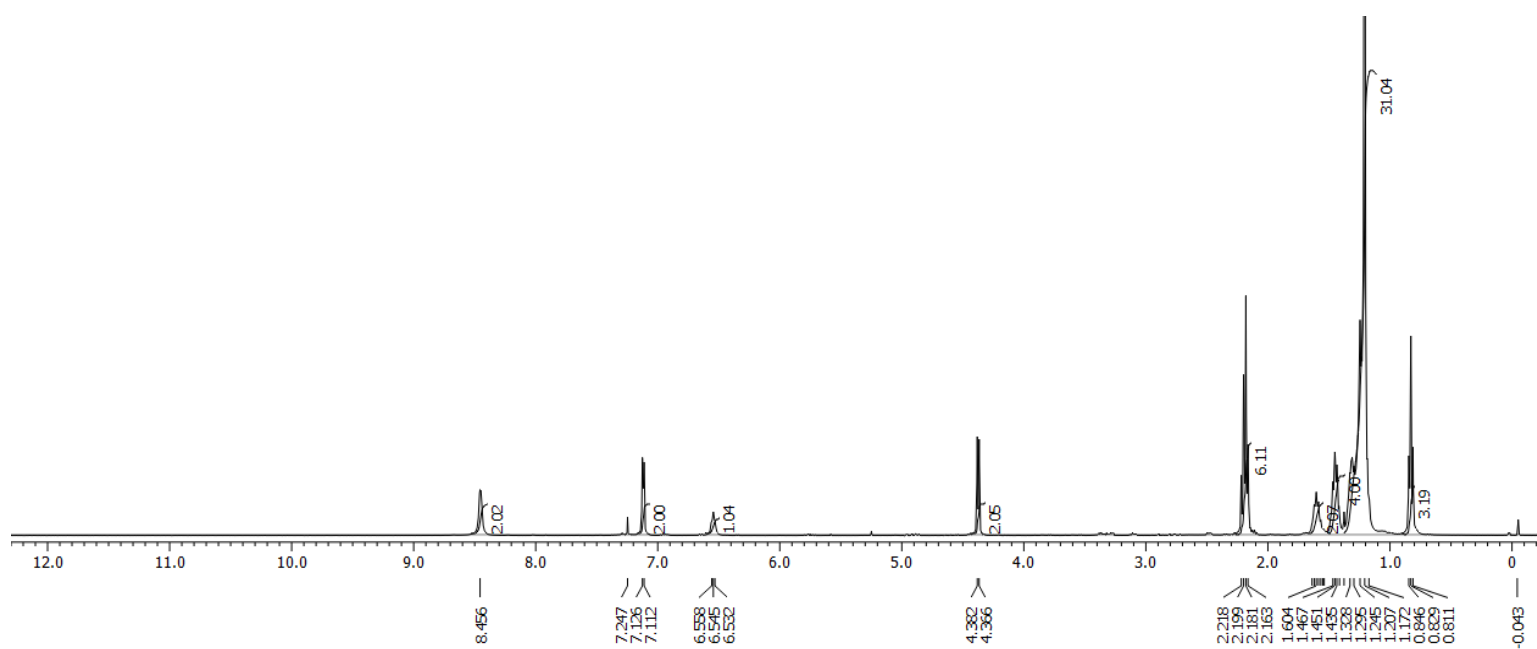

Figure S3.i: <sup>1</sup>H NMR spectra of *N*-(1,2,3,4-tetrahydronaphthalen-1-yl)pentacos-10,12-diyne



PCDA- NAP 3

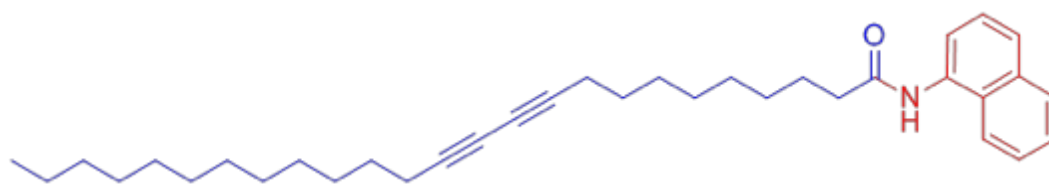

*N*-(naphthalen-1-yl)pentacos-10,12-diynamide

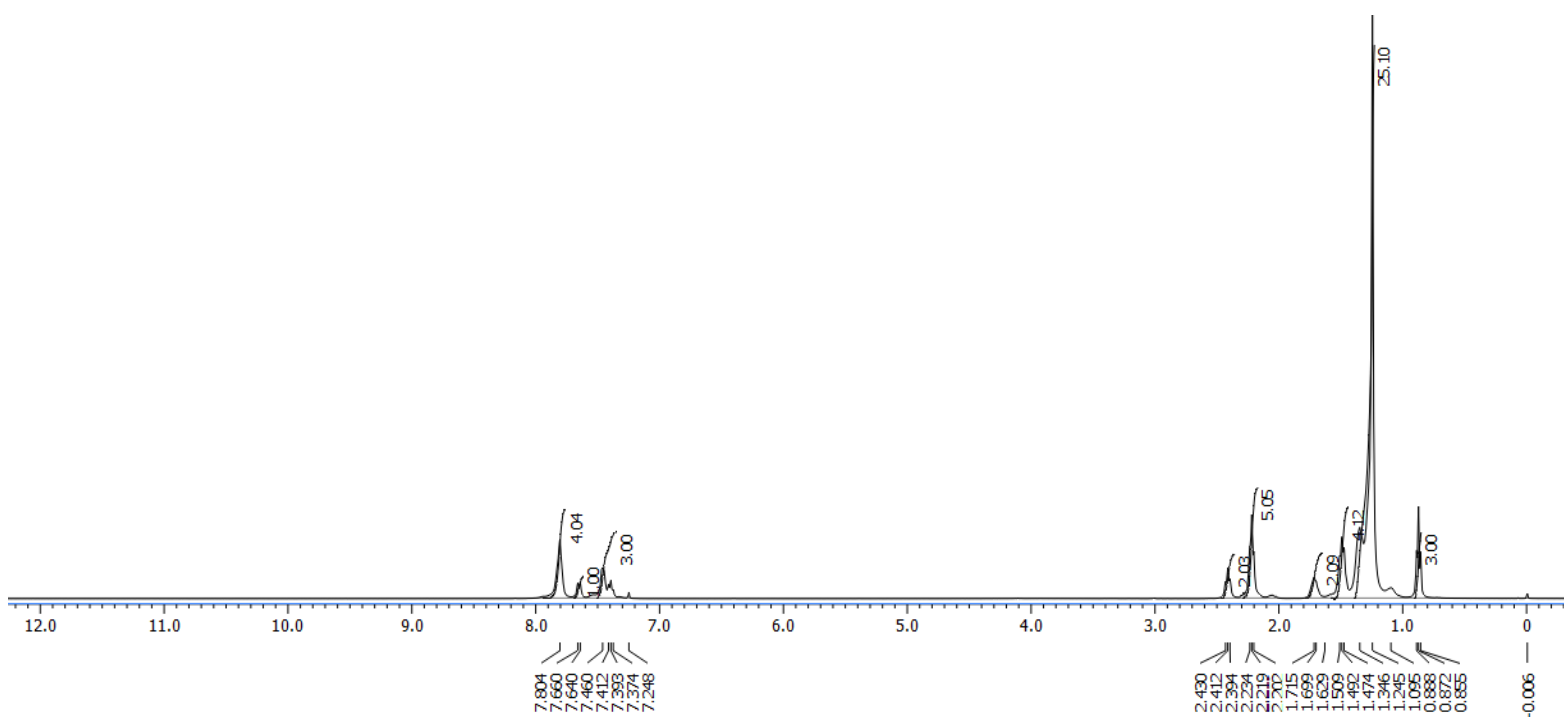

Figure S4.i: <sup>1</sup>H NMR spectra of *N*-(naphthalen-1-yl)pentacos-10,12-diynamide



PCDA- AFL 4

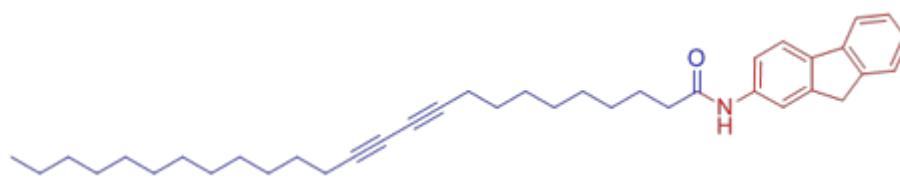

*N*-(9*H*-fluoren-2-yl)pentacos-10,12-diynamide

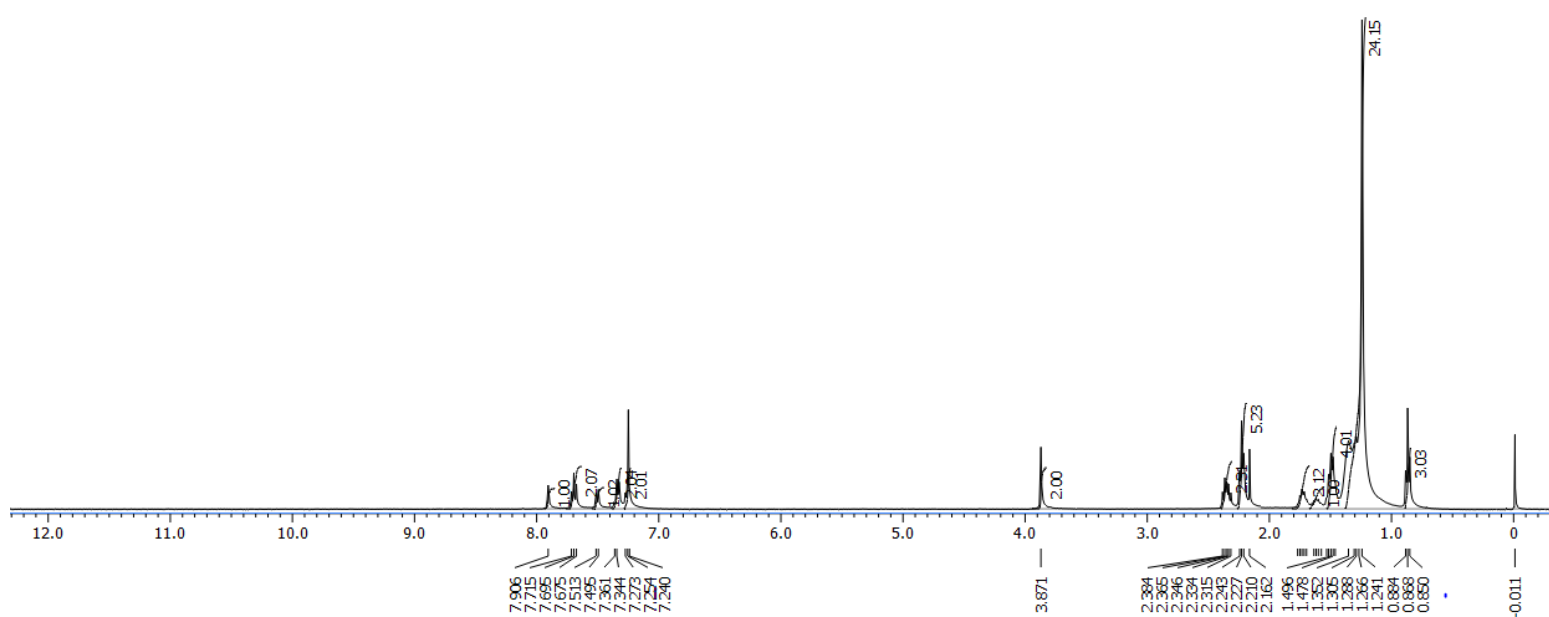

Figure S5.i:  $^1\text{H}$  NMR spectra of *N*-(9*H*-fluoren-2-yl)pentacos-10,12-diynamide



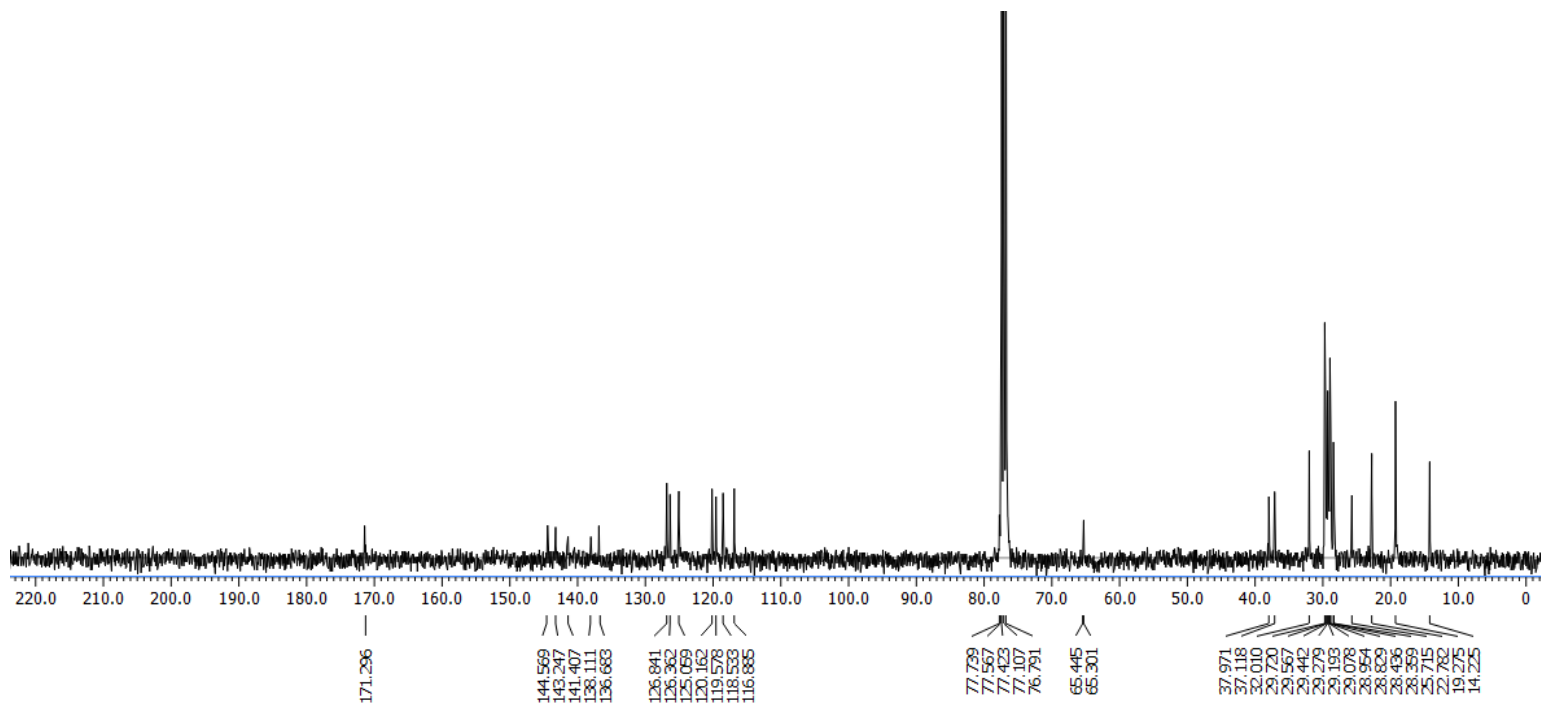

Figure S5.ii:  $^{13}\text{C}$  NMR spectra of *N*-(9*H*-fluoren-2-yl)pentacosamide

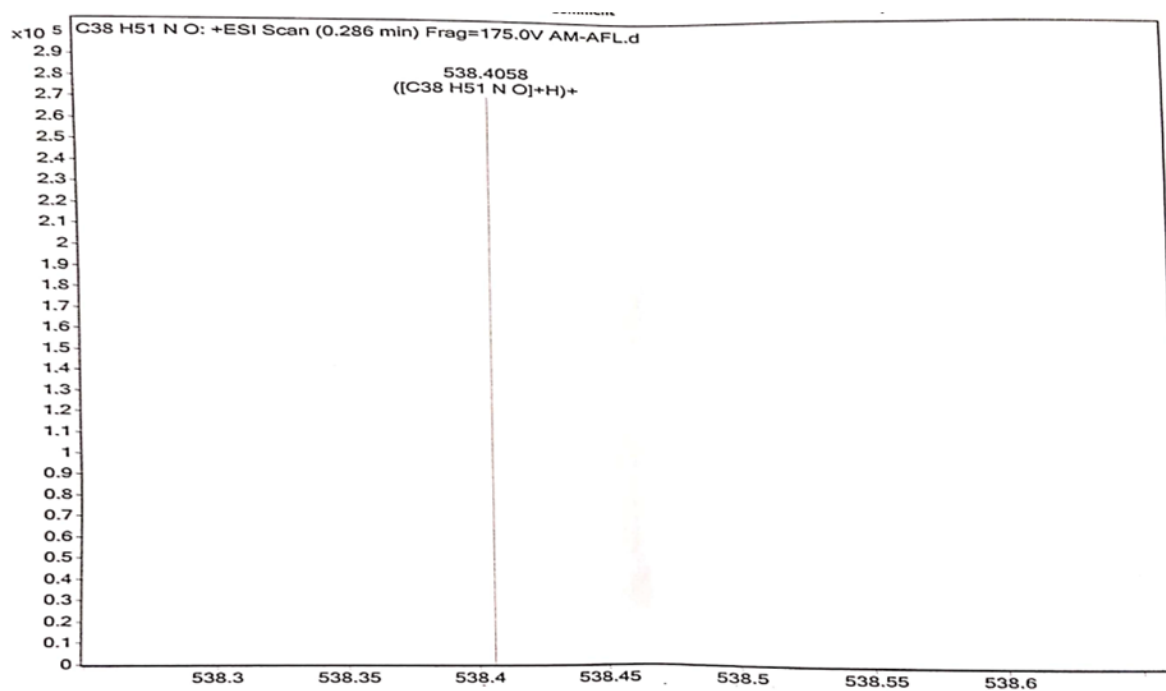

Figure S5.iii: HRMS spectra of *N*-(9*H*-fluoren-2-yl)pentacosamide
